# Supplementary material for: Metabolite-based mutualism between Pseudomonas aeruginosa PA14 and Enterobacter aerogenes enhances current generation in bioelectrochemical systems
Source: Royal Society of Chemistry journal article supplement (doi:10.1039/c1ee01377g), 2011-01-01
Supplement: c1ee01377g.pdf [file c1ee01377g.pdf]

Supplementary Material (ESI) for Energy & Environmental Science  
This journal is © The Royal Society of Chemistry 2008

Electronic Supplementary Information for

**Metabolite-based mutualism between *Pseudomonas aeruginosa* PA14 and *Enterobacter aerogenes* enhances current production in bioelectrochemical systems**

**Arvind Venkataraman,<sup>a</sup> Miriam A. Rosenbaum,<sup>a</sup> Sarah D. Perkins,<sup>b</sup> Jeffrey J. Werner <sup>a</sup> and Largus T. Angenent<sup>\*a</sup>**

<sup>a</sup> *Department of Biological and Environmental Engineering, Cornell University, Ithaca, NY, USA. Fax: +1 607 257 4449 Tel: +1 607 255 2480; E-mail: la249@cornell.edu*

<sup>b</sup> *Present Address: United States Environmental Protection Agency, National Homeland Security Research Centre, 26 W Martin Luther King Drive, Cincinnati, OH, USA. Fax: +1 513 487 2555 Tel: +1 513 569 7978, E-mail: Perkins\_Sarah@epamail.epa.gov*

Supplementary Material (ESI) for Energy & Environmental Science  
This journal is © The Royal Society of Chemistry 2008

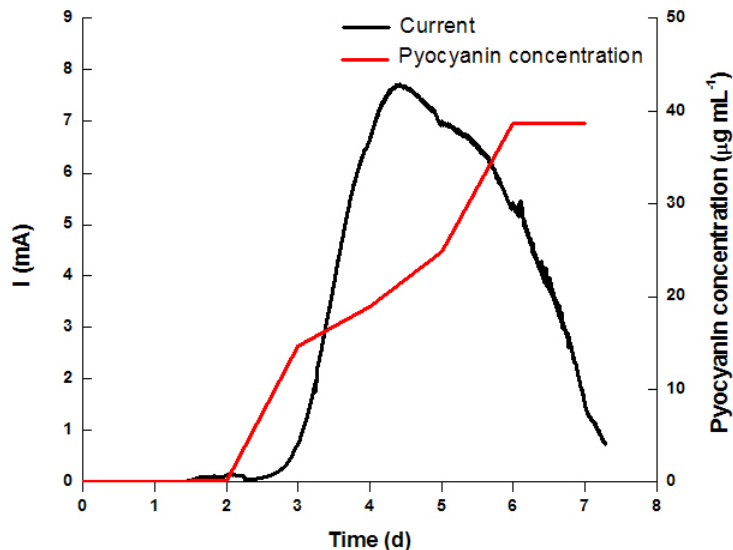

Figure S1. Current vs. time and pyocyanin vs. time for one trial of the co-culture experiment (*E. aerogenes* in association with *P. aeruginosa*).

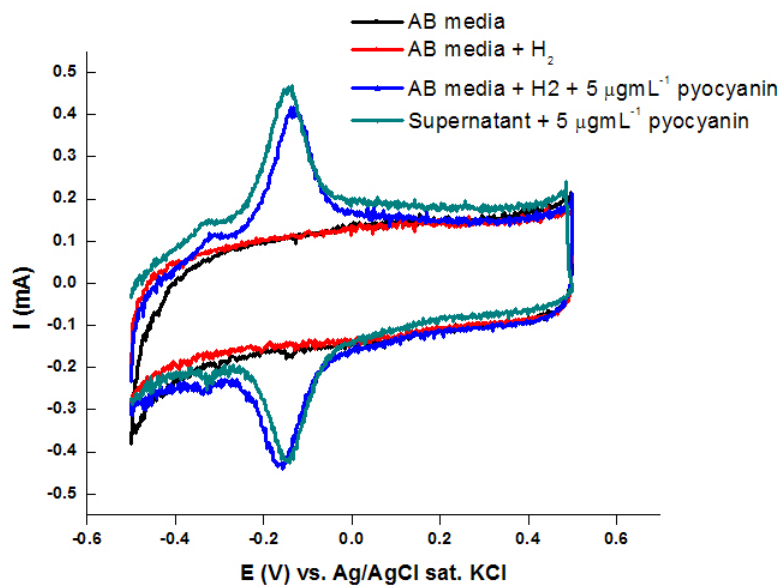

Figure S2. Cyclic voltammograms of carbon cloth electrode in AB media sparged with hydrogen and addition of 5 µg mL<sup>-1</sup> pyocyanin.

Supplementary Material (ESI) for Energy & Environmental Science  
This journal is © The Royal Society of Chemistry 2008

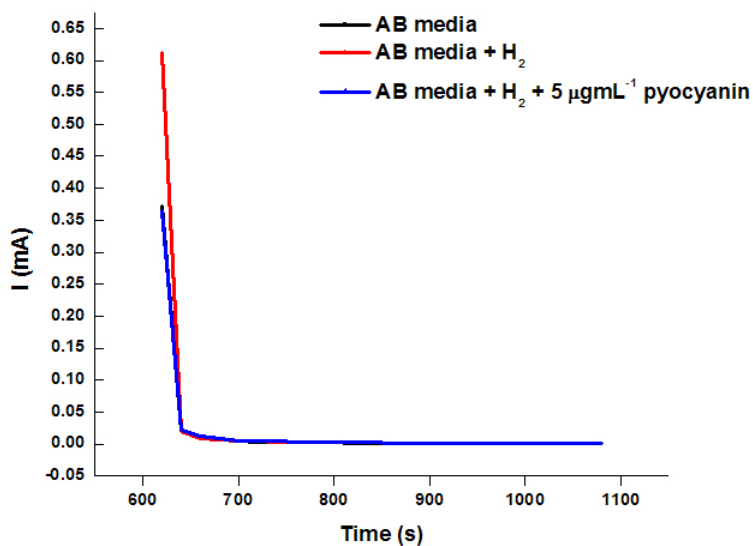

Figure S3. Chronoamperometry with carbon cloth electrode in AB media sparged with hydrogen and addition of 5 μg mL<sup>-1</sup> pyocyanin at 0.3 V vs. Ag/AgCl sat. KCl.

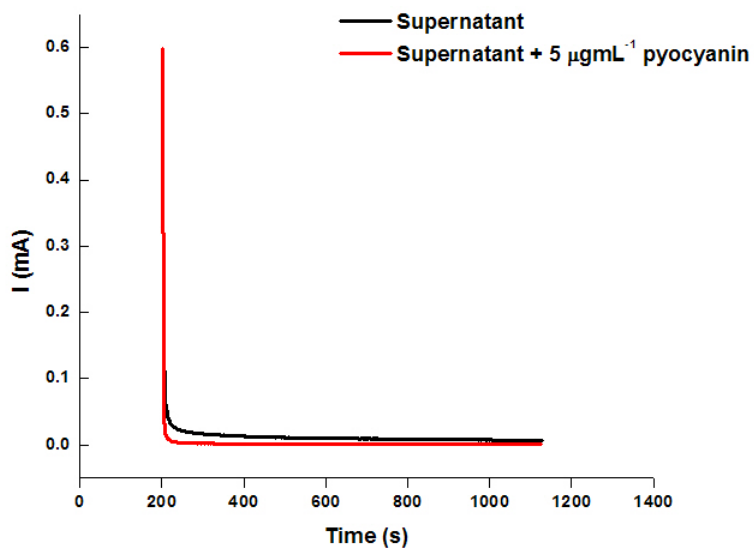

Figure S4. Chronoamperometry with carbon cloth electrode of *E. aerogenes* with 0 μg mL<sup>-1</sup> pyocyanin and 5 μg mL<sup>-1</sup> pyocyanin at 0.3 V vs. Ag/AgCl sat. KCl.
